# Supplementary material for: Siloxane treatment of metal oxide semiconductor gas sensors in temperature-cycled operation – sensitivity and selectivity
Source: Copernicus journal article supplement (doi:10.5194/jsss-9-283-2020), 2020-08-28
Supplement: Supplementary file 1 [file jsss-9-283-2020-supplement.pdf]

Supplement of J. Sens. Sens. Syst., 9, 283–292, 2020  
<https://doi.org/10.5194/jsss-9-283-2020-supplement>  
© Author(s) 2020. This work is distributed under  
the Creative Commons Attribution 4.0 License.

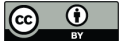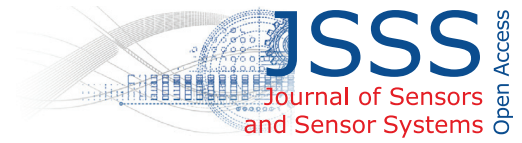

*Supplement of*

## **Siloxane treatment of metal oxide semiconductor gas sensors in temperature-cycled operation – sensitivity and selectivity**

**Caroline Schultealbert et al.**

*Correspondence to:* Caroline Schultealbert ([c.schultealbert@lmt.uni-saarland.de](mailto:c.schultealbert@lmt.uni-saarland.de))

The copyright of individual parts of the supplement might differ from the CC BY 4.0 License.

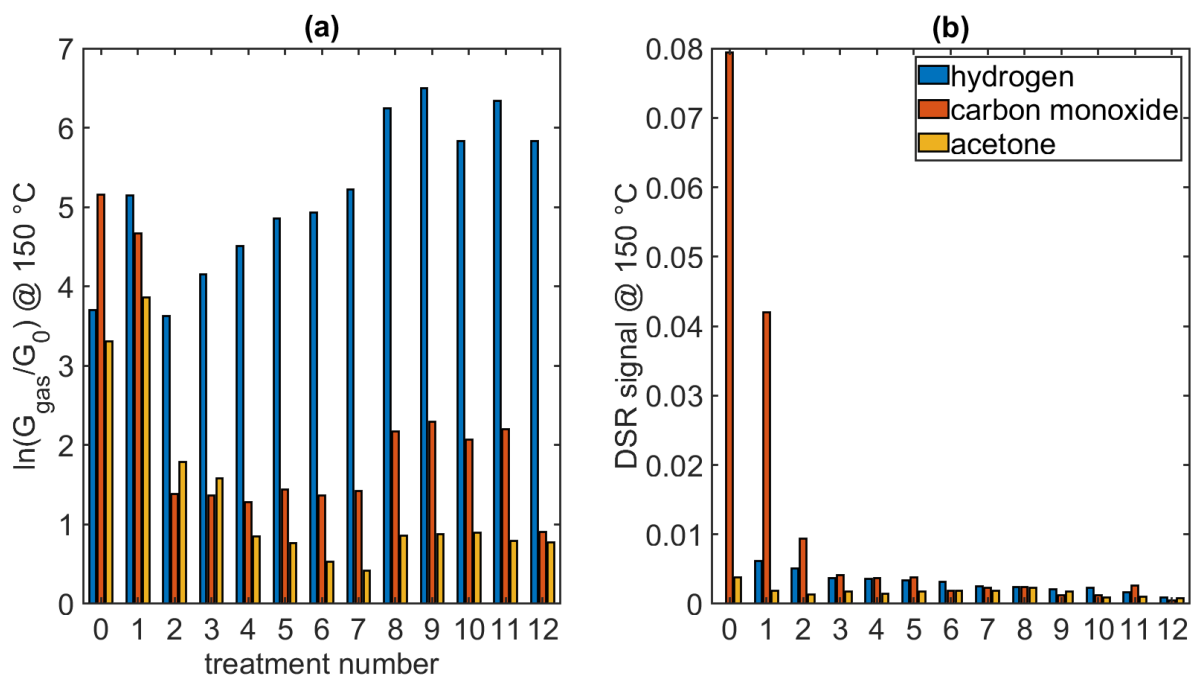

Figure S1: (a) The quasistatic sensor response at the end of the 150 °C phase for the three measured gases at 2 ppm over the treatment process. (b) The DSR signal on the 150 °C phase for the three measured gases at 2 ppm over the treatment process.

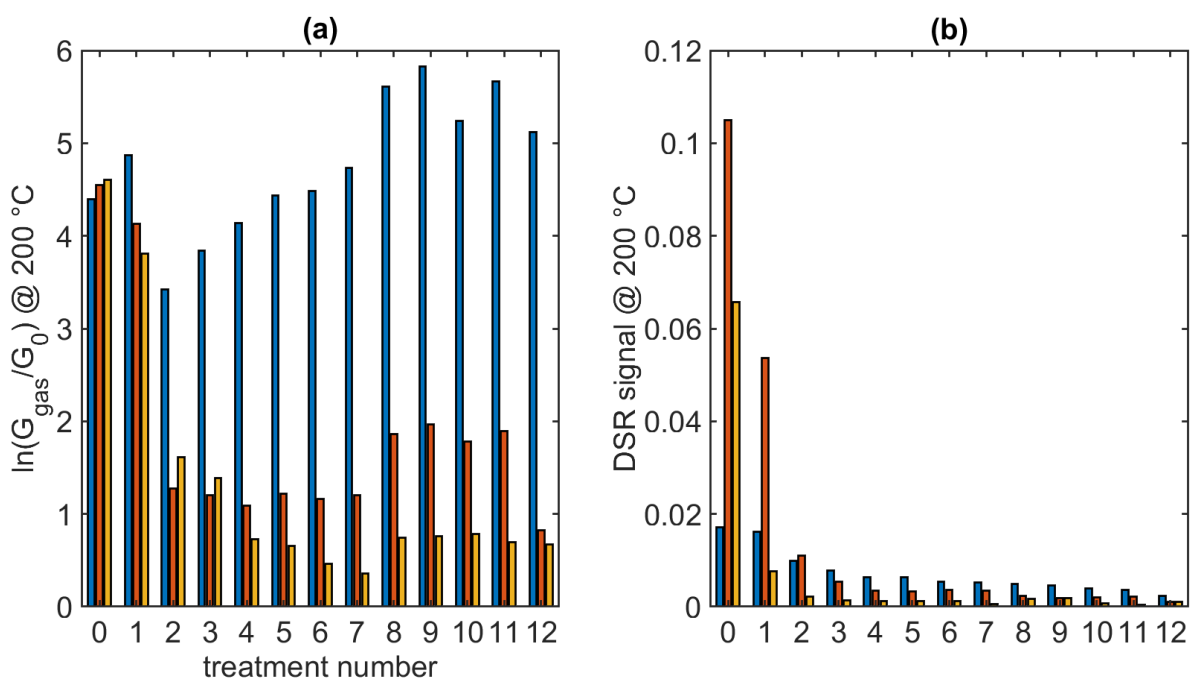

Figure S2: (a) The quasistatic sensor response at the end of the 200 °C phase for the three measured gases at 2 ppm over the treatment process. (b) The DSR signal on the 200 °C phase for the three measured gases at 2 ppm over the treatment process.

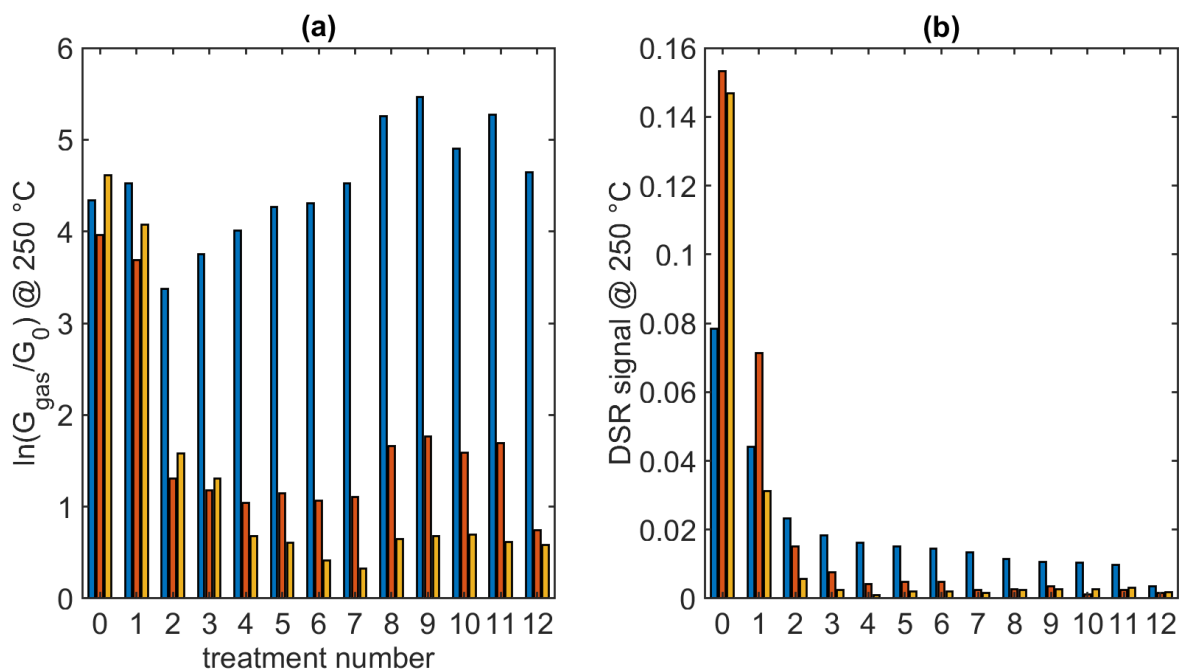

Figure S3: (a) The quasistatic sensor response at the end of the 250 °C phase for the three measured gases at 2 ppm over the treatment process. (b) The DSR signal on the 250 °C phase for the three measured gases at 2 ppm over the treatment process.

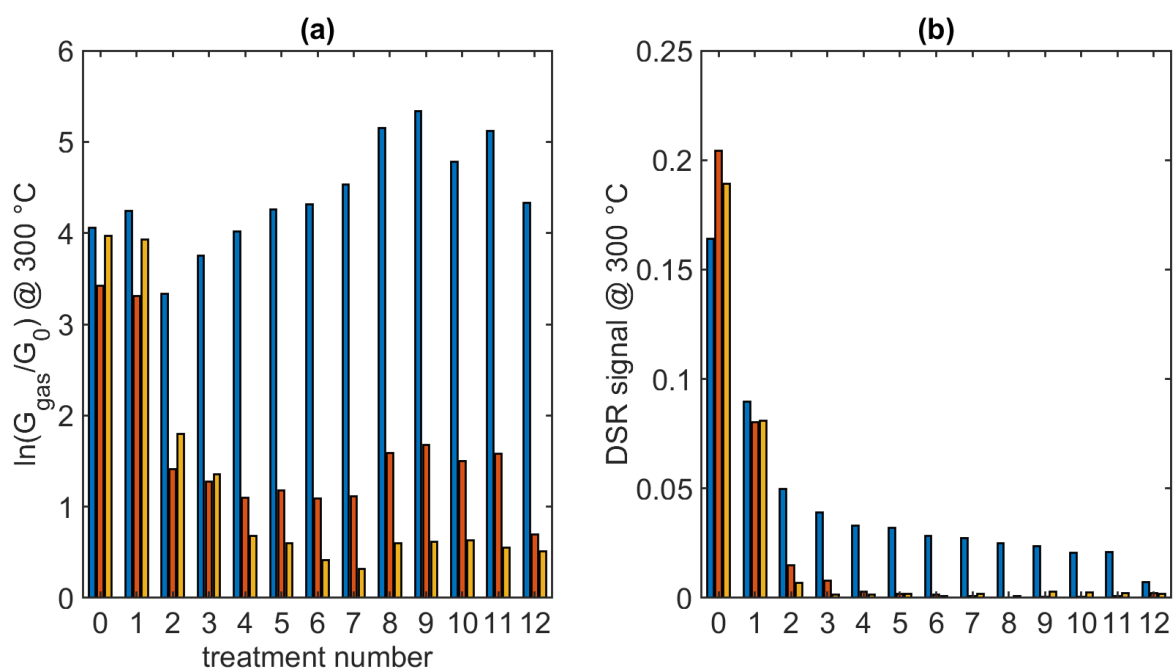

Figure S4: (a) The quasistatic sensor response at the end of the 300 °C phase for the three measured gases at 2 ppm over the treatment process. (b) The DSR signal on the 300 °C phase for the three measured gases at 2 ppm over the treatment process.

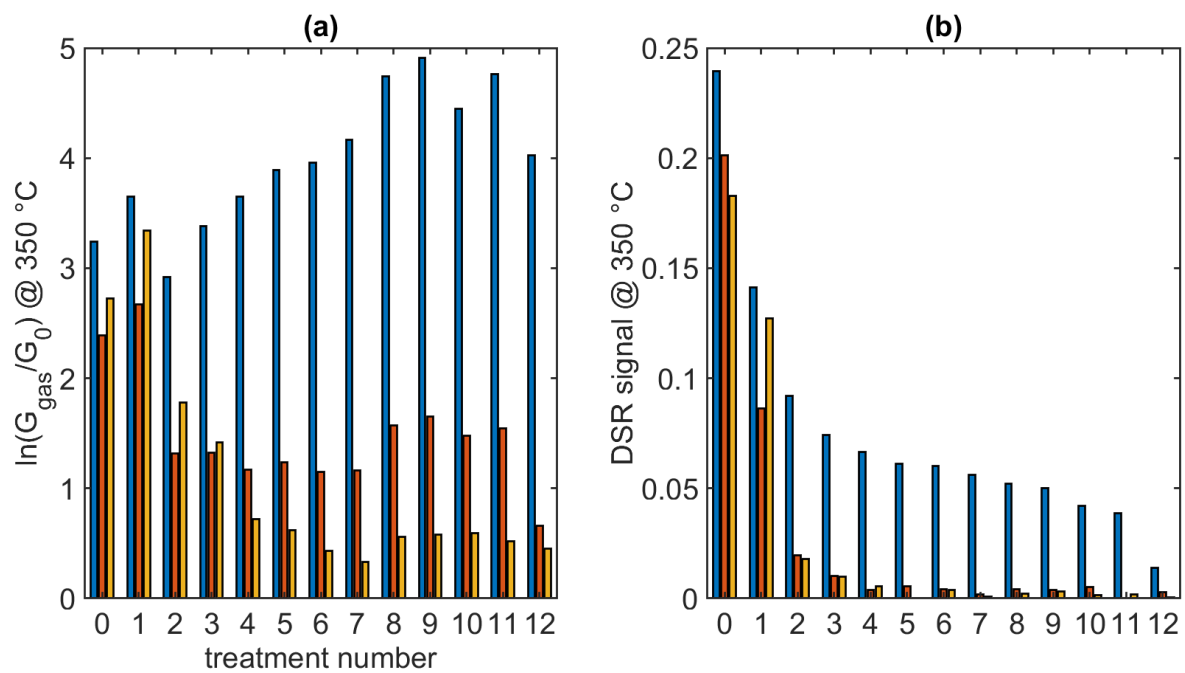

Figure S5: (a) The quasistatic sensor response at the end of the 350 °C phase for the three measured gases at 2 ppm over the treatment process. (b) The DSR signal on the 350 °C phase for the three measured gases at 2 ppm over the treatment process.
